# Supplementary material for: Are interventions in reproductive medicine assessed for plausible and clinically relevant effects? A systematic review of power and precision in trials and meta-analyses
Source: PubMed Central journal article supplement — Hum Reprod. 2019 Mar 6;34(4):659–65. doi: 10.1093/humrep/dez017 (PMC6443111; doi:10.1093/humrep/dez017), 2019-03-06
Supplement: dez017_supplementary_data.pdf [file dez017_supplementary_data.pdf]

Example of data extraction using [Armstrong et al. \(2015\)](#).

Review title: *Time-lapse systems for embryo incubation and assessment in assisted reproduction*

There are two comparisons within this review:

**Comparison 1:** Time-lapse systems with cell-tracking algorithms versus time-lapse systems without cell-tracking algorithms.

- Number of participants in largest RCT in live birth meta-analysis for Comparison 1:0 (i.e. no live birth data)
- Number of participants in meta-analysis for Comparison 1:0
- Estimated odds ratio (95% CI) for largest RCT: inestimable
- Estimated odds ratio (95% CI) for live birth meta-analysis: inestimable

**Comparison 2:** Time-lapse systems versus conventional incubation.

- Number of participants in largest RCT in live birth meta-analysis for Comparison 2: [Kahraman et al. \(2013\)](#) (38 per arm).

- Number of participants in live birth meta-analysis for Comparison 2:38 per arm (only one RCT in the meta-analysis).
- Estimated odds ratio (95% CI) for largest RCT: 1.11 (0.45–2.73)
- Estimated odds ratio (95% CI) for live birth meta-analysis: 1.11 (0.45–2.73)

**Sensitivity analyses:**

- Number of participants in largest RCT with live birth data in the review: [Kahraman \(2013\)](#) (38 per arm).
- Number of participants in largest meta-analysis in the review: 38 per arm.
- Estimated odds ratio (95% CI) for largest RCT in the review: 1.11 (0.45–2.73)
- Estimated odds ratio (95% CI) for largest live birth meta-analysis in the review: 1.11 (0.45–2.73)
