# Supplementary material for: Are interventions in reproductive medicine assessed for plausible and clinically relevant effects? A systematic review of power and precision in trials and meta-analyses
Source: PubMed Central journal article supplement — Hum Reprod. 2019 Mar 6;34(4):659–65. doi: 10.1093/humrep/dez017 (PMC6443111; doi:10.1093/humrep/dez017), 2019-03-06
Supplement: dez017_supplementary_table_s1.pdf [file dez017_supplementary_table_s1.pdf]

**Supplementary Table S1** Sensitivity analyses for the largest RCT and the largest meta-analysis in each Cochrane Review.

|                                                  |                                 | <b>5-pp LBR improvement</b> | <b>10-pp LBR improvement</b> | <b>15-pp LBR improvement</b> | <b>20-pp LBR improvement</b> |
|--------------------------------------------------|---------------------------------|-----------------------------|------------------------------|------------------------------|------------------------------|
| Largest RCT in review<br><i>N</i> = 77           | Median power                    | 19%                         | 53%                          | 84%                          | 97%                          |
|                                                  | IQR                             | 13–27%                      | 33–73%                       | 60–97%                       | 83–100%                      |
|                                                  | Range                           | 6–69%                       | 7–100%                       | 9–100%                       | 13–100%                      |
|                                                  | Proportion with 90% (80%) power | 0% (0%)                     | 12% (20%)                    | 39% (55%)                    | 66% (78%)                    |
| Largest meta-analysis in review<br><i>N</i> = 77 | Median power                    | 29%                         | 76%                          | 97%                          | 100%                         |
|                                                  | IQR                             | 17–54%                      | 48–98%                       | 79–100%                      | 95–100%                      |
|                                                  | Range                           | 6–100%                      | 7–100%                       | 9–100%                       | 13–100%                      |
|                                                  | Proportion with 90% (80%) power | 3% (5%)                     | 35% (48%)                    | 64% (74%)                    | 79% (82%)                    |

Power to detect improvements in live birth rate of different sizes for randomised controlled trial (RCTs) and meta-analyses included in the review. LBR, live birth rate; IQR, interquartile range; pp, percentage points.
