# Supplementary material for: Are interventions in reproductive medicine assessed for plausible and clinically relevant effects? A systematic review of power and precision in trials and meta-analyses
Source: PubMed Central journal article supplement — Hum Reprod. 2019 Mar 6;34(4):659–65. doi: 10.1093/humrep/dez017 (PMC6443111; doi:10.1093/humrep/dez017), 2019-03-06
Supplement: dez017_supplementary_table_s2.pdf [file dez017_supplementary_table_s2.pdf]

**Supplementary Table SII Sensitivity analyses for the largest RCT and the largest meta-analysis in each Cochrane Review.**

|                                          | What LBR improvements are studies powered to detect? |                     | What LBR improvements are actually estimated in the studies? |                 |
|------------------------------------------|------------------------------------------------------|---------------------|--------------------------------------------------------------|-----------------|
|                                          | 80% Power to detect                                  | 90% Power to detect | Estimated LBR improvement                                    | Width of 95% CI |
| Largest RCT in review $N = 77$           | 14 (11–20)pp                                         | 17 (13–23)pp        | 1 (–2 to 5)pp                                                | 19 (13–27)pp    |
| Largest meta-analysis in review $N = 77$ | 10 (7–15)pp                                          | 12 (8–18)pp         | 2 (–2 to 6)pp                                                | 13 (10–21)pp    |

Effect sizes that studies have 80 and 90% power to detect, effect sizes actually estimated by the studies, and precision of the estimates, as measured by width of 95% CI. Median (IQR).
